# Supplementary material for: Rapid Genetic Diagnosis of Citrin Deficiency by Multicolor Melting Curve Analysis
Source: Front Pediatr. 2021 May 5;9:654527. doi: 10.3389/fped.2021.654527 (PMC8133314; doi:10.3389/fped.2021.654527)
Supplement: Supplementary file 4 [file Table_4.xlsx]

## Sheet: Table S4
Table S4 The raw data of the carriers in the clinical study
Sample No.	Sample type	c.851_854del (FAM channel)			c.1638_1660dup (CY5 channel)			IVS6+5G>A (CY5 channel)			IVS16ins3kb (ROX channel)		Result
		Tm1 (Mutant)	Tm2 (Wild-type)		Tm1 (Mutant)	Tm2 (Wild-type)		Tm1 (Mutant)	Tm2 (Wild-type)		Tm1 (Mutant)	Tm2 (Wild-type)
Citrin001	cord blood	63.64	71.22		NA	69.67		NA	58.29		NA	67.18	WT/c.851_854del
Citrin002	cord blood	63.64	71.21		NA	69.7		NA	58.31		NA	67.2	WT/c.851_854del
Citrin003	cord blood	63.74	71.26		NA	69.72		NA	58.41		NA	67.21	WT/c.851_854del
Citrin004	cord blood	63.66	71.18		NA	69.7		NA	58.28		NA	67.11	WT/c.851_854del
Citrin005	cord blood	63.58	71.14		NA	69.58		NA	58.27		NA	67.12	WT/c.851_854del
Citrin006	cord blood	63.72	71.27		NA	69.72		NA	58.33		NA	67.25	WT/c.851_854del
Citrin007	cord blood	63.58	71.15		NA	69.65		NA	58.25		NA	67.14	WT/c.851_854del
Citrin008	cord blood	63.57	71.18		NA	69.6		NA	58.19		NA	67.12	WT/c.851_854del
Citrin009	cord blood	63.56	71.13		NA	69.61		NA	58.29		NA	67.09	WT/c.851_854del
Citrin010	cord blood	63.73	71.27		NA	69.78		NA	58.32		NA	67.09	WT/c.851_854del
Citrin011	cord blood	63.54	71.15		NA	69.66		NA	58.25		NA	67.16	WT/c.851_854del
Citrin012	cord blood	63.6	71.16		NA	69.65		NA	58.26		NA	67.08	WT/c.851_854del
Citrin013	cord blood	63.72	71.32		NA	69.78		NA	58.39		NA	67.32	WT/c.851_854del
Citrin014	cord blood	63.76	71.23		NA	69.69		NA	58.29		NA	67.15	WT/c.851_854del
Citrin015	cord blood	63.67	71.21		NA	69.71		NA	58.26		NA	67.07	WT/c.851_854del
Citrin016	cord blood	63.66	71.25		NA	69.72		NA	58.33		NA	67.18	WT/c.851_854del
Citrin017	cord blood	63.66	71.22		NA	69.71		NA	58.29		NA	67.17	WT/c.851_854del
Citrin018	cord blood	63.66	71.21		NA	69.73		NA	58.34		NA	67.12	WT/c.851_854del
Citrin019	cord blood	63.84	71.33		NA	69.91		NA	58.35		NA	67.2	WT/c.851_854del
Citrin020	cord blood	63.4	71.08		NA	69.65		NA	58.27		NA	67.15	WT/c.851_854del
Citrin021	cord blood	63.84	71.23		NA	69.72		NA	58.34		NA	67.2	WT/c.851_854del
Citrin022	cord blood	63.78	71.3		NA	69.82		NA	58.25		NA	67.08	WT/c.851_854del
Citrin023	cord blood	63.66	71.22		NA	69.69		NA	58.29		NA	67.19	WT/c.851_854del
Citrin024	cord blood	63.82	71.33		NA	69.77		NA	58.35		NA	67.2	WT/c.851_854del
Citrin025	cord blood	63.83	71.34		NA	69.82		NA	58.29		NA	67.25	WT/c.851_854del
Citrin026	cord blood	63.76	71.27		NA	69.78		NA	58.25		NA	67.12	WT/c.851_854del
Citrin027	cord blood	63.74	71.29		NA	69.74		NA	58.37		NA	67.28	WT/c.851_854del
Citrin028	cord blood	63.77	71.3		NA	69.6		NA	58.35		NA	67.2	WT/c.851_854del
Citrin029	cord blood	63.64	71.2		NA	69.62		NA	58.25		NA	67.22	WT/c.851_854del
Citrin030	cord blood	63.73	71.23		NA	69.64		NA	58.27		NA	67.22	WT/c.851_854del
Citrin031	cord blood	64.02	71.36		NA	69.56		NA	58.03		NA	67.09	WT/c.851_854del
Citrin032	cord blood	63.56	71.14		NA	69.4		NA	58.17		NA	67.11	WT/c.851_854del
Citrin033	cord blood	63.83	71.32		NA	69.69		NA	58.23		NA	67.18	WT/c.851_854del
Citrin034	cord blood	63.7	71.23		NA	69.6		NA	58.2		NA	67.09	WT/c.851_854del
Citrin035	cord blood	63.71	71.28		NA	69.67		NA	58.26		NA	67.16	WT/c.851_854del
Citrin036	cord blood	63.67	71.21		NA	69.61		NA	58.25		NA	67.17	WT/c.851_854del
Citrin037	cord blood	63.8	71.35		NA	69.71		NA	58.35		NA	67.26	WT/c.851_854del
Citrin038	cord blood	63.78	71.29		NA	69.67		NA	58		NA	67.09	WT/c.851_854del
Citrin039	cord blood	63.69	71.2		NA	69.61		NA	58.12		NA	67.09	WT/c.851_854del
Citrin040	cord blood	63.68	71.22		NA	69.58		NA	58.27		NA	67.14	WT/c.851_854del
Citrin041	cord blood	63.78	71.28		NA	69.54		NA	58.25		NA	67.11	WT/c.851_854del
Citrin042	cord blood	63.79	71.29		NA	69.57		NA	58.27		NA	67.12	WT/c.851_854del
Citrin043	cord blood	63.81	71.31		NA	69.71		NA	58.16		NA	67.1	WT/c.851_854del
Citrin044	cord blood	63.76	71.31		NA	69.66		NA	58.29		NA	67.26	WT/c.851_854del
Citrin045	cord blood	63.71	71.31		NA	69.71		NA	58.32		NA	67.31	WT/c.851_854del
Citrin046	cord blood	63.67	71.27		NA	69.65		NA	58.27		NA	67.23	WT/c.851_854del
Citrin047	cord blood	63.54	71.11		NA	69.58		NA	58.15		NA	67.1	WT/c.851_854del
Citrin048	cord blood	63.89	71.3		NA	69.71		NA	58.12		NA	67.06	WT/c.851_854del
Citrin049	cord blood	63.98	71.36		NA	69.67		NA	58.19		NA	67.09	WT/c.851_854del
Citrin050	cord blood	63.7	71.28		NA	69.67		NA	58.32		NA	67.25	WT/c.851_854del
Citrin051	cord blood	63.76	71.28		NA	69.65		NA	58.24		NA	67.14	WT/c.851_854del
Citrin052	cord blood	63.73	71.28		NA	69.65		NA	58.31		NA	67.21	WT/c.851_854del
Citrin053	cord blood	63.61	71.18		NA	69.56		NA	58.25		NA	67.11	WT/c.851_854del
Citrin054	cord blood	63.86	71.28		NA	69.61		NA	58.11		NA	67.03	WT/c.851_854del
Citrin055	cord blood	63.64	71.22		NA	69.55		NA	58.25		NA	67.17	WT/c.851_854del
Citrin056	cord blood	63.55	71.14		NA	69.56		NA	58.19		NA	67.08	WT/c.851_854del
Citrin057	cord blood	63.63	71.19		NA	69.58		NA	58.23		NA	67.14	WT/c.851_854del
Citrin058	cord blood	63.7	71.2		NA	69.54		NA	58.25		NA	67.03	WT/c.851_854del
Citrin059	cord blood	63.55	71.14		NA	69.55		NA	58.17		NA	67.06	WT/c.851_854del
Citrin060	cord blood	63.55	71.09		NA	69.49		NA	58.14		NA	67.04	WT/c.851_854del
Citrin061	cord blood	63.51	71.1		NA	69.6		NA	58.28		NA	67.14	WT/c.851_854del
Citrin062	cord blood	63.51	71.08		NA	69.57		NA	58.2		NA	67.15	WT/c.851_854del
Citrin063	cord blood	63.49	71.11		NA	69.6		NA	58.21		NA	67.22	WT/c.851_854del
Citrin064	cord blood	63.45	71.02		NA	69.5		NA	57.96		NA	66.99	WT/c.851_854del
Citrin065	cord blood	63.55	71.11		NA	69.55		NA	58.21		NA	67.18	WT/c.851_854del
Citrin066	cord blood	63.57	71.12		NA	69.5		NA	58.19		NA	67.15	WT/c.851_854del
Citrin067	dried blood spot	63.5	70.99		NA	69.57		NA	58.03		NA	66.91	WT/c.851_854del
Citrin068	dried blood spot	63.65	71.21		NA	69.67		NA	58.31		NA	67.18	WT/c.851_854del
Citrin069	dried blood spot	63.67	71.21		NA	69.65		NA	58.44		NA	67.13	WT/c.851_854del
Citrin070	dried blood spot	63.71	71.23		NA	69.69		NA	58.35		NA	67.15	WT/c.851_854del
Citrin071	dried blood spot	63.59	71.17		NA	69.66		NA	58.27		NA	67.13	WT/c.851_854del
Citrin072	dried blood spot	63.67	71.18		NA	69.7		NA	58.26		NA	67.07	WT/c.851_854del
Citrin073	dried blood spot	63.83	71.26		NA	69.47		NA	58.08		NA	66.98	WT/c.851_854del
Citrin074	dried blood spot	63.59	71.18		NA	69.34		NA	58.24		NA	67.08	WT/c.851_854del
Citrin075	dried blood spot	63.79	71.28		NA	69.48		NA	58.22		NA	67.05	WT/c.851_854del
Citrin076	dried blood spot	63.9	71.36		NA	69.73		NA	58.11		NA	67.11	WT/c.851_854del
Citrin077	dried blood spot	63.83	71.26		NA	69.67		NA	58.8		NA	67.05	WT/c.851_854del
Citrin078	cord blood	NA	71.34		75.56	69.65		NA	58.35		NA	67.27	WT/c.1638_1660dup
Citrin079	cord blood	NA	71.16		75.52	69.69		NA	58.13		NA	67.12	WT/c.1638_1660dup
Citrin080	cord blood	NA	71.2		75.51	69.59		NA	58.23		NA	67.21	WT/c.1638_1660dup
Citrin081	cord blood	NA	71.26		75.6	69.7		NA	58.21		NA	67.2	WT/c.1638_1660dup
Citrin082	cord blood	NA	71.22		75.36	69.69		NA	58.15		NA	67.17	WT/c.1638_1660dup
Citrin083	cord blood	NA	71.08		75.35	69.51		NA	58.21		NA	67.08	WT/c.1638_1660dup
Citrin084	cord blood	NA	71.16		75.48	69.56		NA	58.19		NA	67.18	WT/c.1638_1660dup
Citrin085	cord blood	NA	71.11		75.44	69.66		NA	58.3		NA	67.03	WT/c.1638_1660dup
Citrin086	cord blood	NA	71.21		75.49	69.58		NA	58.22		NA	67.17	WT/c.1638_1660dup
Citrin087	cord blood	NA	71.23		75.53	69.58		NA	58.27		NA	67.17	WT/c.1638_1660dup
Citrin088	cord blood	NA	71.2		75.34	69.53		NA	58.23		NA	67.17	WT/c.1638_1660dup
Citrin089	cord blood	NA	71.24		75.39	69.57		NA	58.27		NA	67.2	WT/c.1638_1660dup
Citrin090	cord blood	NA	71.22		75.63	69.7		NA	58.35		NA	67.19	WT/c.1638_1660dup
Citrin091	cord blood	NA	71.3		75.6	69.95		NA	58.4		NA	67.18	WT/c.1638_1660dup
Citrin092	cord blood	NA	71.14		75.55	69.84		NA	58.33		NA	67.11	WT/c.1638_1660dup
Citrin093	cord blood	NA	71.17		75.51	69.55		NA	58.24		NA	67.14	WT/c.1638_1660dup
Citrin094	cord blood	NA	71.24		NA	69.8		51.34	58.37		NA	67.21	WT/IVS6+5G>A
Citrin095	cord blood	NA	71.25		NA	69.75		51.38	58.36		NA	67.26	WT/IVS6+5G>A
Citrin096	cord blood	NA	71.19		NA	69.64		51.41	58.27		NA	67.15	WT/IVS6+5G>A
Citrin097	cord blood	NA	71.22		NA	69.66		51.18	58.15		NA	67.15	WT/IVS6+5G>A
Citrin098	cord blood	NA	71.32		NA	69.66		51.27	58.12		NA	67.08	WT/IVS6+5G>A
Citrin099	cord blood	NA	71.15		NA	69.62		51.19	58.19		NA	67.12	WT/IVS6+5G>A
Citrin100	cord blood	NA	71.18		NA	69.57		51.3	58.4		NA	67.2	WT/IVS6+5G>A
Citrin101	cord blood	NA	71.15		NA	69.64		NA	58.32		57.36	67.05	WT/IVS16ins3kb
Citrin102	cord blood	NA	71.15		NA	69.41		NA	58.29		57.37	67.04	WT/IVS16ins3kb
Citrin103	cord blood	NA	71.21		NA	69.56		NA	58.15		57.37	67.11	WT/IVS16ins3kb
Citrin104	cord blood	NA	71.16		NA	69.7		NA	58.37		57.41	67.07	WT/IVS16ins3kb
Citrin105	cord blood	NA	71.22		NA	69.7		NA	58.31		57.45	67.08	WT/IVS16ins3kb
Citrin106	cord blood	NA	71.19		NA	69.58		NA	58.2		57.22	67.08	WT/IVS16ins3kb
Citrin107	cord blood	NA	71.21		NA	69.75		NA	58.25		57.46	67.15	WT/IVS16ins3kb
Citrin108	cord blood	NA	71.16		63.79	69.81		NA	58.19		NA	67.18	WT/c.1656C>T
Citrin109	cord blood	NA	70.97		65.94	70.12		NA	58.18		NA	67.04	WT/c.1658G>A
Citrin110	cord blood	NA	71.24		65.94	70.07		NA	58.19		NA	67.06	WT/c.1658G>A
NA: not applicable
